# Supplementary material
Source: publisher site journal article supplement (https://www.spandidos-publications.com/3801/downloadSupplementary)

Figure S1. Light microscopy of chondrocytes (magnification, x40).

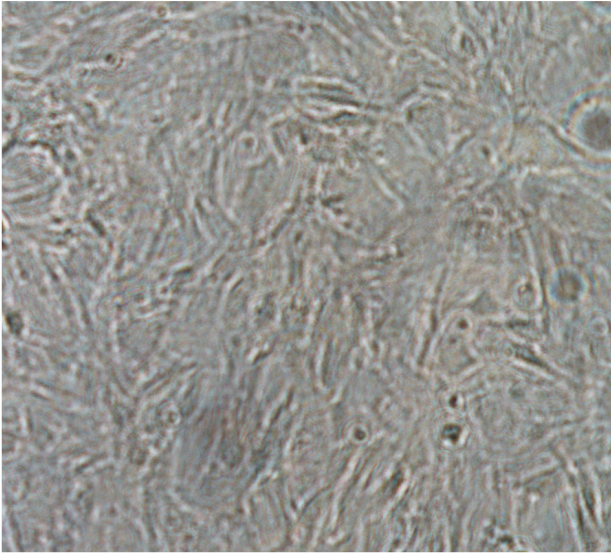

Supplement: Supplementary file 1 [file downloadSupplementary]
